# Supplementary material for: Reduction in Allergenicity and Induction of Oral Tolerance of Glycated Tropomyosin from Crab
Source: MDPI journal article supplement (doi:10.3390/molecules27062027), 2022-03-21

**Table S1 Specific IgE Levels and Symptoms of the Crab-Sensitive Patients**

| No. | Serum No. | Age | Gender | Crab specific IgE | Specific IgE of TM    | Symptoms                    |
|-----|-----------|-----|--------|-------------------|-----------------------|-----------------------------|
|     |           |     |        | (kUA/L)           | from crab (OD 450 nm) |                             |
| 1   | B119847   | 17  | F      | 3.69              | 0.12                  | Cough                       |
| 2   | A281913   | 55  | F      | 15.50             | 0.16                  | Eczema                      |
| 3   | B159030   | 8   | M      | 24                | 0.14                  | Allergic purpura            |
| 4   | B134851   | 1   | F      | 6.47              | 0.15                  | Systemic lupus erthematosus |
| 5   | A819807   | 31  | M      | 5.36              | 0.14                  | Eczema                      |
| 6   | B156635   | 12  | M      | 2.69              | 0.12                  | Eczema                      |
| 7   | B134016   | 29  | M      | 11.20             | 0.17                  | Cough                       |
| 8   | B450961   | 48  | F      | 9.81              | 0.13                  | Lungs infected              |
| 9   | B127123   | 67  | M      | 0.15              | 0.07                  | -                           |
| 10  | A820983   | 23  | F      | 0.09              | 0.06                  | -                           |

**Table S2 Prediction results of MHC-II binding area for mouse H-2 T cell epitopes from TM**

| No. | Allele | Start | End | Peptide           | Adjusted rank |
|-----|--------|-------|-----|-------------------|---------------|
| 1   | H2-IAd | 1     | 13  | MDAIKKKMQAMKL     | 22.38         |
| 2   | H2-IAd | 4     | 20  | IKKKMQAMKLEKDNAMD | 24.19         |
| 3   | H2-IAd | 55    | 69  | NELDQAQEQLSAANT   | 22.2          |
| 4   | H2-IAd | 60    | 74  | AQEQLSAANTKLDEK   | 27            |
| 5   | H2-IAd | 100   | 114 | ERSEERLNTATTKLA   | 30            |
| 6   | H2-IAd | 111   | 127 | TKLAEASQAADSEMR   | 28.87         |
| 7   | H2-IAd | 124   | 138 | ERM RKVLENRSLSDE  | 25.5          |
| 8   | H2-IAd | 145   | 159 | ENQLKEARFLAEEAD   | 29.5          |
| 9   | H2-IAd | 160   | 173 | KYDEVARKLAMVE     | 24.95         |
| 10  | H2-IAd | 168   | 182 | KLAMVEADLERAEER   | 26.5          |
| 11  | H2-IAd | 217   | 231 | REETYKEQIKTLANK   | 25.95         |
| 12  | H2-IAb | 231   | 247 | KLKAAEARAFAERSVQ  | 28.96         |
| 13  | H2-IEd | 236   | 250 | EARAFAERSVQKLQ    | 14.5          |

**Table S3 Prediction results of MHC-II binding for human HLA T cells epitopes from TM**

| No. | Allele         | Start | End | Peptide           | Adjusted rank |
|-----|----------------|-------|-----|-------------------|---------------|
| 1   | HLA-DRB4*01:01 | 1     | 16  | MDAIKKKMQAMKLEKD  | 2.89          |
| 2   | HLA-DRB4*01:01 | 2     | 16  | DAIKKKMQAMKLEKD   | 2.4           |
| 3   | HLA-DRB4*01:01 | 2     | 17  | DAIKKKMQAMKLEKDN  | 2.42          |
| 4   | HLA-DRB4*01:01 | 3     | 17  | AIKKKMQAMKLEKDN   | 1.8           |
| 5   | HLA-DRB4*01:01 | 3     | 18  | AIKKKMQAMKLEKDNA  | 1.85          |
| 6   | HLA-DRB4*01:01 | 3     | 16  | AIKKKMQAMKLEKD    | 2.15          |
| 7   | HLA-DRB4*01:01 | 3     | 19  | AIKKKMQAMKLEKDNAM | 2.9           |
| 8   | HLA-DRB4*01:01 | 4     | 18  | IKKKMQAMKLEKDNA   | 1.7           |
| 9   | HLA-DRB4*01:01 | 4     | 17  | IKKKMQAMKLEKDN    | 1.94          |
| 10  | HLA-DRB4*01:01 | 4     | 19  | IKKKMQAMKLEKDNAM  | 1.96          |
| 11  | HLA-DRB4*01:01 | 4     | 16  | IKKKMQAMKLEKD     | 2.81          |
| 12  | HLA-DRB4*01:01 | 5     | 19  | KKKMQAMKLEKDNAM   | 2.1           |
| 13  | HLA-DRB4*01:01 | 5     | 18  | KKKMQAMKLEKDNA    | 2.15          |
| 14  | HLA-DRB4*01:01 | 5     | 20  | KKKMQAMKLEKDNAMD  | 2.54          |
| 15  | HLA-DRB1*03:01 | 8     | 22  | MQAMKLEKDNAMDRA   | 2.6           |
| 16  | HLA-DRB1*03:01 | 9     | 22  | QAMKLEKDNAMDRA    | 1.83          |
| 17  | HLA-DRB1*03:01 | 9     | 23  | QAMKLEKDNAMDRA    | 2.4           |
| 18  | HLA-DRB1*03:01 | 10    | 23  | AMKLEKDNAMDRA     | 1.94          |
| 19  | HLA-DRB1*03:01 | 10    | 22  | AMKLEKDNAMDRA     | 2.03          |
| 20  | HLA-DRB1*03:01 | 10    | 24  | AMKLEKDNAMDRA     | 2.6           |
| 21  | HLA-DRB1*11:01 | 81    | 95  | AEGEVAALNRRIQLL   | 2.7           |
| 22  | HLA-DRB1*11:01 | 82    | 95  | EGEVAALNRRIQLL    | 2.05          |
| 23  | HLA-DRB1*11:01 | 82    | 96  | EGEVAALNRRIQLLE   | 2.3           |
| 24  | HLA-DRB1*11:01 | 82    | 94  | EGEVAALNRRIQL     | 2.81          |
| 25  | HLA-DRB1*11:01 | 83    | 96  | GEVAALNRRIQLLE    | 1.83          |

|    |                           |     |     |                   |      |
|----|---------------------------|-----|-----|-------------------|------|
| 26 | HLA-DRB1*11:01            | 83  | 95  | GEVAALNRRIQLL     | 2.03 |
| 27 | HLA-DRB1*11:01            | 83  | 97  | GEVAALNRRIQLLEE   | 2.1  |
| 28 | HLA-DRB1*11:01            | 83  | 98  | GEVAALNRRIQLLEED  | 2.89 |
| 29 | HLA-DQA1*05:01/DQB1*02:01 | 86  | 100 | AALNRRIQLLEEDLE   | 2.5  |
| 30 | HLA-DQA1*05:01/DQB1*02:01 | 87  | 100 | ALNRRIQLLEEDLE    | 2.15 |
| 31 | HLA-DQA1*05:01/DQB1*02:01 | 88  | 100 | LNRRRIQLLEEDLE    | 2.49 |
| 32 | HLA-DQA1*01:02/DQB1*06:02 | 102 | 117 | SEERLNTATTKLAEAS  | 2.08 |
| 33 | HLA-DQA1*01:02/DQB1*06:02 | 102 | 118 | SEERLNTATTKLAEASQ | 2.73 |
| 34 | HLA-DQA1*01:02/DQB1*06:02 | 103 | 117 | EERLNTATTKLAEAS   | 1.6  |
| 35 | HLA-DQA1*01:02/DQB1*06:02 | 103 | 118 | EERLNTATTKLAEASQ  | 1.62 |
| 36 | HLA-DQA1*01:02/DQB1*06:02 | 103 | 119 | EERLNTATTKLAEASQA | 2.55 |
| 37 | HLA-DQA1*01:02/DQB1*06:02 | 104 | 118 | ERLNTATTKLAEASQ   | 1.3  |
| 38 | HLA-DQA1*01:02/DQB1*06:02 | 104 | 117 | ERLNTATTKLAEAS    | 1.4  |
| 39 | HLA-DQA1*01:02/DQB1*06:02 | 104 | 119 | ERLNTATTKLAEASQA  | 1.62 |
| 40 | HLA-DQA1*01:02/DQB1*06:02 | 104 | 120 | ERLNTATTKLAEASQAA | 2.73 |
| 41 | HLA-DQA1*01:02/DQB1*06:02 | 105 | 118 | RLNTATTKLAEASQ    | 1.4  |
| 42 | HLA-DQA1*01:02/DQB1*06:02 | 105 | 119 | RLNTATTKLAEASQA   | 1.4  |

**Continuation Table S3**

|    |                           |     |     |                   |      |
|----|---------------------------|-----|-----|-------------------|------|
| 43 | HLA-DQA1*01:02/DQB1*06:02 | 105 | 117 | RLNTATTKLAEAS     | 1.72 |
| 44 | HLA-DQA1*01:02/DQB1*06:02 | 105 | 120 | RLNTATTKLAEASQAA  | 1.85 |
| 45 | HLA-DQA1*01:02/DQB1*06:02 | 105 | 121 | RLNTATTKLAEASQAAD | 2.73 |
| 46 | HLA-DQA1*01:02/DQB1*06:02 | 106 | 121 | LNTATTKLAEASQAAD  | 2.65 |
| 47 | HLA-DQA1*01:02/DQB1*06:02 | 106 | 119 | LNTATTKLAEASQA    | 2.69 |
| 48 | HLA-DQA1*01:02/DQB1*06:02 | 106 | 118 | LNTATTKLAEASQ     | 2.81 |
| 49 | HLA-DQA1*03:01/DQB1*03:02 | 109 | 123 | ATTKLAEASQAADDES  | 2.1  |
| 50 | HLA-DQA1*03:01/DQB1*03:02 | 109 | 124 | ATTKLAEASQAADSE   | 2.54 |
| 51 | HLA-DQA1*03:01/DQB1*03:02 | 110 | 124 | TTKLAEASQAADSE    | 1.6  |
| 52 | HLA-DQA1*03:01/DQB1*03:02 | 110 | 123 | TTKLAEASQAADDES   | 2.26 |

|    |                           |     |     |                   |      |
|----|---------------------------|-----|-----|-------------------|------|
| 53 | HLA-DQA1*03:01/DQB1*03:02 | 110 | 125 | TTKLAEASQAADER    | 2.65 |
| 54 | HLA-DQA1*03:01/DQB1*03:02 | 111 | 124 | TKLAEASQAADER     | 1.72 |
| 55 | HLA-DQA1*03:01/DQB1*03:02 | 111 | 125 | TKLAEASQAADER     | 2.4  |
| 56 | HLA-DQA1*03:01/DQB1*03:02 | 111 | 126 | TKLAEASQAADERM    | 2.77 |
| 57 | HLA-DQA1*03:01/DQB1*03:02 | 112 | 125 | KLAEASQAADER      | 2.8  |
| 58 | HLA-DQA1*03:01/DQB1*03:02 | 112 | 126 | KLAEASQAADERM     | 2.8  |
| 59 | HLA-DQA1*03:01/DQB1*03:02 | 112 | 124 | KLAEASQAADER      | 2.81 |
| 60 | HLA-DQA1*04:01/DQB1*04:02 | 145 | 159 | ENQLKEARFLAEEAD   | 2.9  |
| 61 | HLA-DQA1*04:01/DQB1*04:02 | 146 | 159 | NQLKEARFLAEEAD    | 2.37 |
| 62 | HLA-DRB5*01:01            | 148 | 162 | LKEARFLAEEADRKY   | 3    |
| 63 | HLA-DRB5*01:01            | 149 | 162 | KEARFLAEEADRKY    | 2.8  |
| 64 | HLA-DRB5*01:01            | 149 | 163 | KEARFLAEEADRKYD   | 2.9  |
| 65 | HLA-DRB5*01:01            | 150 | 163 | EARFLAEEADRKYD    | 2.58 |
| 66 | HLA-DRB5*01:01            | 150 | 164 | EARFLAEEADRKYDE   | 2.8  |
| 67 | HLA-DRB5*01:01            | 151 | 164 | ARFLAEEADRKYDE    | 2.69 |
| 68 | HLA-DRB5*01:01            | 151 | 165 | ARFLAEEADRKYDEV   | 2.8  |
| 69 | HLA-DQA1*03:01/DQB1*03:02 | 163 | 177 | DEVARKLAMVEADLE   | 2.9  |
| 70 | HLA-DQA1*03:01/DQB1*03:02 | 164 | 177 | EVARKLAMVEADLE    | 2.8  |
| 71 | HLA-DQA1*03:01/DQB1*03:02 | 165 | 181 | VARKLAMVEADLERAE  | 1.6  |
| 72 | HLA-DQA1*05:01/DQB1*02:01 | 165 | 179 | VARKLAMVEADLER    | 2.6  |
| 73 | HLA-DQA1*03:01/DQB1*03:02 | 165 | 180 | VARKLAMVEADLERAE  | 3    |
| 74 | HLA-DQA1*03:01/DQB1*03:02 | 166 | 181 | ARKLAMVEADLERAE   | 0.99 |
| 75 | HLA-DQA1*03:01/DQB1*03:02 | 166 | 182 | ARKLAMVEADLERAEER | 1.67 |
| 76 | HLA-DQA1*05:01/DQB1*02:01 | 166 | 179 | ARKLAMVEADLER     | 2.15 |
| 77 | HLA-DQA1*04:01/DQB1*04:02 | 166 | 181 | ARKLAMVEADLERAE   | 2.31 |
| 78 | HLA-DQA1*05:01/DQB1*02:01 | 166 | 180 | ARKLAMVEADLERAE   | 2.7  |
| 79 | HLA-DQA1*05:01/DQB1*02:01 | 166 | 178 | ARKLAMVEADLER     | 2.96 |
| 80 | HLA-DQA1*03:01/DQB1*03:02 | 167 | 181 | RKLAMVEADLERAE    | 0.92 |

|    |                           |     |     |                   |      |
|----|---------------------------|-----|-----|-------------------|------|
| 81 | HLA-DQA1*03:01/DQB1*03:02 | 167 | 182 | RKLAMVEADLERAEER  | 0.99 |
| 82 | HLA-DQA1*03:01/DQB1*03:02 | 167 | 183 | RKLAMVEADLERAEERA | 1.55 |
| 83 | HLA-DQA1*04:01/DQB1*04:02 | 167 | 181 | RKLAMVEADLERAE    | 1.6  |
| 84 | HLA-DQA1*04:01/DQB1*04:02 | 167 | 182 | RKLAMVEADLERAEER  | 2.31 |
| 85 | HLA-DQA1*05:01/DQB1*02:01 | 167 | 181 | RKLAMVEADLERAE    | 2.6  |

**Continuation Table S3**

|     |                           |     |     |                   |      |
|-----|---------------------------|-----|-----|-------------------|------|
| 86  | HLA-DQA1*03:01/DQB1*03:02 | 168 | 181 | KLAMVEADLERAE     | 1.29 |
| 87  | HLA-DQA1*03:01/DQB1*03:02 | 168 | 182 | KLAMVEADLERAEER   | 1.4  |
| 88  | HLA-DQA1*04:01/DQB1*04:02 | 168 | 181 | KLAMVEADLERAE     | 1.72 |
| 89  | HLA-DQA1*03:01/DQB1*03:02 | 168 | 183 | KLAMVEADLERAEERA  | 1.73 |
| 90  | HLA-DQA1*04:01/DQB1*04:02 | 168 | 182 | KLAMVEADLERAEER   | 2.1  |
| 91  | HLA-DQA1*03:01/DQB1*03:02 | 168 | 184 | KLAMVEADLERAEERAE | 2.73 |
| 92  | HLA-DQA1*03:01/DQB1*03:02 | 169 | 182 | LAMVEADLERAEER    | 1.18 |
| 93  | HLA-DQA1*03:01/DQB1*03:02 | 169 | 181 | LAMVEADLERAE      | 1.29 |
| 94  | HLA-DQA1*03:01/DQB1*03:02 | 169 | 183 | LAMVEADLERAEERA   | 1.3  |
| 95  | HLA-DQA1*03:01/DQB1*03:02 | 169 | 184 | LAMVEADLERAEERAE  | 1.62 |
| 96  | HLA-DQA1*04:01/DQB1*04:02 | 169 | 182 | LAMVEADLERAEER    | 1.83 |
| 97  | HLA-DQA1*04:01/DQB1*04:02 | 169 | 181 | LAMVEADLERAE      | 1.87 |
| 98  | HLA-DQA1*04:01/DQB1*04:02 | 169 | 183 | LAMVEADLERAEERA   | 2.2  |
| 99  | HLA-DQA1*04:01/DQB1*04:02 | 169 | 184 | LAMVEADLERAEERAE  | 2.65 |
| 100 | HLA-DQA1*03:01/DQB1*03:02 | 169 | 185 | LAMVEADLERAEERAE  | 2.73 |
| 101 | HLA-DQA1*03:01/DQB1*03:02 | 170 | 183 | AMVEADLERAEERA    | 1.4  |
| 102 | HLA-DQA1*03:01/DQB1*03:02 | 170 | 184 | AMVEADLERAEERAE   | 1.5  |
| 103 | HLA-DQA1*03:01/DQB1*03:02 | 170 | 182 | AMVEADLERAEER     | 1.72 |
| 104 | HLA-DQA1*03:01/DQB1*03:02 | 170 | 181 | AMVEADLERAE       | 1.78 |
| 105 | HLA-DQA1*03:01/DQB1*03:02 | 170 | 185 | AMVEADLERAEERAE   | 2.42 |
| 106 | HLA-DQA1*03:01/DQB1*03:02 | 171 | 184 | MVEADLERAEERAE    | 1.29 |
| 107 | HLA-DQA1*03:01/DQB1*03:02 | 171 | 183 | MVEADLERAEERA     | 1.47 |

|     |                           |     |     |                  |      |
|-----|---------------------------|-----|-----|------------------|------|
| 108 | HLA-DQA1*03:01/DQB1*03:02 | 171 | 185 | MVEADLERAEERAES  | 1.5  |
| 109 | HLA-DQA1*03:01/DQB1*03:02 | 171 | 182 | MVEADLERAEER     | 1.78 |
| 110 | HLA-DQA1*03:01/DQB1*03:02 | 171 | 186 | MVEADLERAEERAESG | 2.42 |
| 111 | HLA-DQA1*03:01/DQB1*03:02 | 172 | 187 | VEADLERAEERAESGE | 2.65 |
| 112 | HLA-DQA1*03:01/DQB1*03:02 | 182 | 196 | RAESGESKIVELEEE  | 2.4  |
| 113 | HLA-DQA1*03:01/DQB1*03:02 | 182 | 197 | RAESGESKIVELEEEL | 3    |
| 114 | HLA-DQA1*05:01/DQB1*02:01 | 183 | 197 | AESGESKIVELEEEL  | 2    |
| 115 | HLA-DQA1*03:01/DQB1*03:02 | 183 | 196 | AESGESKIVELEEE   | 2.05 |
| 116 | HLA-DQA1*03:01/DQB1*03:02 | 183 | 197 | AESGESKIVELEEEL  | 2.1  |
| 117 | HLA-DQA1*05:01/DQB1*02:01 | 184 | 197 | ESGESKIVELEEEL   | 1.62 |
| 118 | HLA-DQA1*03:01/DQB1*03:02 | 184 | 197 | ESGESKIVELEEEL   | 1.72 |
| 119 | HLA-DQA1*05:01/DQB1*02:01 | 184 | 198 | ESGESKIVELEEELR  | 2.2  |
| 120 | HLA-DQA1*03:01/DQB1*03:02 | 184 | 196 | ESGESKIVELEEE    | 2.49 |
| 121 | HLA-DQA1*05:01/DQB1*02:01 | 184 | 199 | ESGESKIVELEEELRV | 2.89 |
| 122 | HLA-DQA1*05:01/DQB1*02:01 | 185 | 198 | SGESKIVELEEELR   | 1.83 |
| 123 | HLA-DQA1*05:01/DQB1*02:01 | 185 | 199 | SGESKIVELEEELRV  | 1.9  |
| 124 | HLA-DQA1*05:01/DQB1*02:01 | 185 | 197 | SGESKIVELEEEL    | 2.03 |
| 125 | HLA-DQA1*03:01/DQB1*03:02 | 185 | 197 | SGESKIVELEEEL    | 2.96 |
| 126 | HLA-DQA1*05:01/DQB1*02:01 | 186 | 199 | GESKIVELEEELRV   | 1.62 |
| 127 | HLA-DQA1*05:01/DQB1*02:01 | 186 | 198 | GESKIVELEEELR    | 2.34 |
| 128 | HLA-DQA1*05:01/DQB1*02:01 | 186 | 200 | GESKIVELEEELRVV  | 2.4  |

**Continuation Table S3**

|     |                           |     |     |                  |      |
|-----|---------------------------|-----|-----|------------------|------|
| 129 | HLA-DQA1*05:01/DQB1*02:01 | 186 | 197 | GESKIVELEEEL     | 2.85 |
| 130 | HLA-DQA1*05:01/DQB1*02:01 | 187 | 200 | ESKIVELEEELRVV   | 2.26 |
| 131 | HLA-DQA1*05:01/DQB1*02:01 | 187 | 199 | ESKIVELEEELRV    | 2.34 |
| 132 | HLA-DRB5*01:01            | 194 | 207 | EEELRVVGNNLKSL   | 2.8  |
| 133 | HLA-DRB5*01:01            | 195 | 208 | EELRVVGNNLKSLE   | 2.8  |
| 134 | HLA-DRB1*08:02            | 219 | 234 | ETYKEQIKTLANKLKA | 1.96 |

|     |                |     |     |                   |      |
|-----|----------------|-----|-----|-------------------|------|
| 135 | HLA-DRB5*01:01 | 219 | 234 | ETYKEQIKTLANKLKA  | 1.96 |
| 136 | HLA-DRB1*08:02 | 219 | 233 | ETYKEQIKTLANKLK   | 2.6  |
| 137 | HLA-DRB5*01:01 | 219 | 235 | ETYKEQIKTLANKLKAA | 2.73 |
| 138 | HLA-DRB5*01:01 | 220 | 234 | TYKEQIKTLANKLKA   | 1.1  |
| 139 | HLA-DRB1*08:02 | 220 | 234 | TYKEQIKTLANKLKA   | 1.2  |
| 140 | HLA-DRB1*08:02 | 220 | 235 | TYKEQIKTLANKLKAA  | 1.73 |
| 141 | HLA-DRB5*01:01 | 220 | 235 | TYKEQIKTLANKLKAA  | 1.73 |
| 142 | HLA-DRB1*08:02 | 220 | 233 | TYKEQIKTLANKLK    | 2.26 |
| 143 | HLA-DRB5*01:01 | 220 | 233 | TYKEQIKTLANKLK    | 2.58 |
| 144 | HLA-DRB5*01:01 | 220 | 236 | TYKEQIKTLANKLKAAE | 2.73 |
| 145 | HLA-DRB1*08:02 | 220 | 236 | TYKEQIKTLANKLKAAE | 2.9  |
| 146 | HLA-DRB5*01:01 | 221 | 234 | YKEQIKTLANKLKA    | 0.84 |
| 147 | HLA-DRB1*08:02 | 221 | 235 | YKEQIKTLANKLKAA   | 0.86 |
| 148 | HLA-DRB5*01:01 | 221 | 235 | YKEQIKTLANKLKAA   | 0.88 |
| 149 | HLA-DRB1*08:02 | 221 | 234 | YKEQIKTLANKLKA    | 1.18 |
| 150 | HLA-DRB1*08:02 | 221 | 236 | YKEQIKTLANKLKAAE  | 1.73 |
| 151 | HLA-DRB5*01:01 | 221 | 236 | YKEQIKTLANKLKAAE  | 1.73 |
| 152 | HLA-DRB5*01:01 | 221 | 237 | YKEQIKTLANKLKAAEA | 2.73 |
| 153 | HLA-DRB1*11:01 | 221 | 235 | YKEQIKTLANKLKAA   | 2.8  |
| 154 | HLA-DRB5*01:01 | 221 | 233 | YKEQIKTLANKLK     | 2.81 |
| 155 | HLA-DRB1*08:02 | 221 | 237 | YKEQIKTLANKLKAAEA | 2.9  |
| 156 | HLA-DRB1*08:02 | 222 | 235 | KEQIKTLANKLKAA    | 0.66 |
| 157 | HLA-DRB5*01:01 | 222 | 235 | KEQIKTLANKLKAA    | 0.78 |
| 158 | HLA-DRB5*01:01 | 222 | 234 | KEQIKTLANKLKA     | 0.84 |
| 159 | HLA-DRB1*08:02 | 222 | 236 | KEQIKTLANKLKAAE   | 0.84 |
| 160 | HLA-DRB5*01:01 | 222 | 236 | KEQIKTLANKLKAAE   | 0.88 |
| 161 | HLA-DRB1*08:02 | 222 | 237 | KEQIKTLANKLKAAEA  | 1.73 |
| 162 | HLA-DRB5*01:01 | 222 | 237 | KEQIKTLANKLKAAEA  | 1.73 |



|     |                |     |     |                   |      |
|-----|----------------|-----|-----|-------------------|------|
| 163 | HLA-DRB1*08:02 | 222 | 234 | KEQIKTLANKLKA     | 1.87 |
| 164 | HLA-DRB5*01:01 | 222 | 238 | KEQIKTLANKLKAAEAR | 2.73 |
| 165 | HLA-DRB1*08:02 | 223 | 236 | EQIKTLANKLKAAE    | 0.72 |
| 166 | HLA-DRB1*08:02 | 223 | 235 | EQIKTLANKLKAA     | 0.78 |
| 167 | HLA-DRB5*01:01 | 223 | 236 | EQIKTLANKLKAAE    | 0.85 |
| 168 | HLA-DRB5*01:01 | 223 | 235 | EQIKTLANKLKAA     | 0.87 |
| 169 | HLA-DRB1*08:02 | 223 | 237 | EQIKTLANKLKAAEA   | 0.9  |
| 170 | HLA-DRB5*01:01 | 223 | 237 | EQIKTLANKLKAAEA   | 1.1  |
| 171 | HLA-DRB5*01:01 | 223 | 234 | EQIKTLANKLKA      | 1.45 |

**Continuation Table S3**

|     |                           |     |     |                  |      |
|-----|---------------------------|-----|-----|------------------|------|
| 172 | HLA-DRB1*08:02            | 223 | 238 | EQIKTLANKLKAAEAR | 1.85 |
| 173 | HLA-DRB5*01:01            | 223 | 238 | EQIKTLANKLKAAEAR | 1.85 |
| 174 | HLA-DRB1*08:02            | 223 | 234 | EQIKTLANKLKA     | 2.28 |
| 175 | HLA-DRB1*11:01            | 223 | 237 | EQIKTLANKLKAAEA  | 3    |
| 176 | HLA-DRB1*08:02            | 224 | 239 | QIKTLANKLKAAEARA | 1.85 |
| 177 | HLA-DRB5*01:01            | 224 | 239 | QIKTLANKLKAAEARA | 2.42 |
| 178 | HLA-DQA1*03:01/DQB1*03:02 | 229 | 243 | ANKLKAAEARAEFAE  | 2.7  |
| 179 | HLA-DQA1*03:01/DQB1*03:02 | 229 | 244 | ANKLKAAEARAEFAER | 2.89 |
| 180 | HLA-DQA1*03:01/DQB1*03:02 | 230 | 244 | NKLKAAEARAEFAER  | 1.6  |
| 181 | HLA-DQA1*03:01/DQB1*03:02 | 230 | 243 | NKLKAAEARAEFAE   | 2.26 |
| 182 | HLA-DQA1*03:01/DQB1*03:02 | 230 | 245 | NKLKAAEARAEFAERS | 2.89 |
| 183 | HLA-DQA1*03:01/DQB1*03:02 | 231 | 244 | KLKAAEARAEFAER   | 1.94 |
| 184 | HLA-DQA1*03:01/DQB1*03:02 | 231 | 245 | KLKAAEARAEFAERS  | 2.3  |
| 185 | HLA-DQA1*03:01/DQB1*03:02 | 231 | 246 | KLKAAEARAEFAERSV | 2.89 |
| 186 | HLA-DQA1*03:01/DQB1*03:02 | 232 | 245 | LKAAEARAEFAERS   | 1.94 |
| 187 | HLA-DQA1*03:01/DQB1*03:02 | 232 | 244 | LKAAEARAEFAER    | 2.18 |
| 188 | HLA-DQA1*03:01/DQB1*03:02 | 232 | 246 | LKAAEARAEFAERSV  | 2.3  |

|     |                           |     |     |                  |      |
|-----|---------------------------|-----|-----|------------------|------|
| 189 | HLA-DQA1*03:01/DQB1*03:02 | 232 | 247 | LKAAEARAEFAERSVQ | 2.89 |
|-----|---------------------------|-----|-----|------------------|------|

---

**Table S4 Identification of glycation sites of TM**

| Modified amino acid | Peptide sequence                  | $\Delta$ Mass | Molecular formula                                            | MV  |
|---------------------|-----------------------------------|---------------|--------------------------------------------------------------|-----|
| K12                 | MQAMK(1)LEK                       | 52            | C <sub>2</sub> H <sub>4</sub> O                              | 54  |
| K15                 | LEK(1)DNAMDR                      | 52            | C <sub>2</sub> H <sub>4</sub> O                              | 54  |
| R21                 | DNAMDR(1)ADTLEQQNK                | 52            | C <sub>2</sub> H <sub>4</sub> O                              | 54  |
| K30                 | ADTLEQQNK(1)EANLR                 | 52            | C <sub>2</sub> H <sub>4</sub> O                              | 54  |
| R35                 | EANLR(1)AEK(1)TEEEIR              | 110           | C <sub>6</sub> H <sub>8</sub> O <sub>2</sub>                 | 112 |
| R44                 | TEEEIR(1)ATQK                     | 52            | C <sub>2</sub> H <sub>4</sub> O                              | 54  |
| K49                 | K(1)MQQVENELDQAQEQLSAANTK         | 148           | C <sub>5</sub> H <sub>10</sub> O <sub>5</sub>                | 150 |
| K70                 | MQQVENELDQAQEQLSAANTK(1)          | 14            | CH <sub>3</sub>                                              | 15  |
| K74                 | LDEK(1)EK(1)ALQNAEGEVAALNR(1)R(1) | 144           | C <sub>5</sub> H <sub>10</sub> N <sub>2</sub> O <sub>3</sub> | 146 |
| K76                 | EK(1)ALQNAEGEVAALNR               | 52            | C <sub>2</sub> H <sub>4</sub> O                              | 54  |
| R90                 | ALQNAEGEVAALNR(1)R                | 68            | C <sub>4</sub> H <sub>6</sub> O                              | 70  |
| R91                 | R(1)IQLLEEDLER                    | 72            | CH <sub>2</sub> CH <sub>2</sub> COOH                         | 73  |
| R101                | RIQLLEEDLER(1)                    | 14            | CH <sub>3</sub>                                              | 15  |
| R105                | IQLLEEDLER(1)SEER(1)              | 52            | C <sub>2</sub> H <sub>4</sub> O                              | 54  |
| K112                | LNTATTK(1)LAEASQAADER             | 79            | C <sub>5</sub> H <sub>4</sub> O                              | 80  |
| R125                | LAEASQAADER(1)                    | 14            | CH <sub>3</sub>                                              | 15  |
| R127                | LAEASQAADER(1)MR(1)               | 52            | C <sub>2</sub> H <sub>4</sub> O                              | 54  |
| K128                | K(1)VLENR(1)SLSDEER               | 52            | C <sub>2</sub> H <sub>4</sub> O                              | 54  |
| R133                | VLENR(1)SLSDEER(1)                | 52            | C <sub>2</sub> H <sub>4</sub> O                              | 54  |
| R140                | SLSDEER(1)                        | 14            | CH <sub>3</sub>                                              | 15  |
| K149                | MDALENQLK(1)                      | 14            | CH <sub>3</sub>                                              | 15  |
| R152                | EAR(1)FLAEEADR                    | 58            | CH <sub>2</sub> COOH                                         | 59  |
| R160                | FLAEEADR(1)                       | 14            | CH <sub>3</sub>                                              | 15  |
| K161                | FLAEEADR(1)K(1)                   | 52            | C <sub>2</sub> H <sub>4</sub> O                              | 54  |
| R167                | KYDEVAR(1)K                       | 52            | C <sub>2</sub> H <sub>4</sub> O                              | 54  |

|      |                         |     |         |     |
|------|-------------------------|-----|---------|-----|
| K168 | K(1)LAMVEADLER          | 14  | CH3     | 15  |
| R178 | LAMVEADLER(1)           | 14  | CH3     | 15  |
| R182 | AEER(1)AESGESKIVELEEELR | 148 | C5H10O5 | 150 |
| K189 | AESGESK(1)IVELEEELR     | 132 | C5H10O5 | 150 |
| R198 | IVELEEELR(1)            | 14  | CH3     | 15  |
| K205 | IVELEEELR(1)VVGNNLK(1)  | 52  | C2H4O   | 54  |
| K213 | SLEVSEEK(1)             | 14  | CH3     | 15  |
| R217 | ANQR(1)EETKY(1)EQIK     | 52  | C2H4O   | 54  |
| K222 | ANQR(1)EETKY(1)EQIK     | 52  | C2H4O   | 54  |
| K226 | EQIK(1)TLANK            | 52  | C2H4O   | 54  |
| K231 | TLANK(0.995)LK          | 52  | C2H4O   | 54  |
| K233 | LK(1)AAEAR              | 52  | C2H4O   | 54  |
| R238 | AAEAR(1)AEFAER          | 52  | C2H4O   | 54  |
| R244 | AEFAER(1)SVQK           | 52  | C2H4O   | 54  |
| K248 | AEFAERSVQK(1)           | 52  | C2H4O   | 54  |
| K251 | LQK(1)EVDRLLEDELVNEK    | 52  | C2H4O   | 54  |

**Continuation Table S4**

|      |                     |    |       |    |
|------|---------------------|----|-------|----|
| R255 | EVDR(1)LEDELVNEKEK  | 68 | C4H6O | 70 |
| K264 | EVDRLLEDELVNEK(1)EK | 79 | C5H4O | 80 |

---

**Figuer S1 BMDCs uptake of FITC-labeled TM and TM-G followed in time**

(A) BMDCs uptake of FITC-labeled TM followed in time.

(B) BMDCs uptake of FITC-labeled TM-G followed in time.

**Figuer S2. Identification of glycation sites of TM-G**

(A-D) identification of the specific amino acids of TM modified by the Maillard reaction using LC-MS/MS. The fragmentation spectrums were shown in the graph with the amino acid in the figure corresponding to A<sub>22</sub>-R<sub>35</sub>, K<sub>49</sub>-K<sub>70</sub>, R<sub>91</sub>-R<sub>101</sub> and E<sub>150</sub>-R<sub>160</sub> of TM-G.

Figuer S1

A

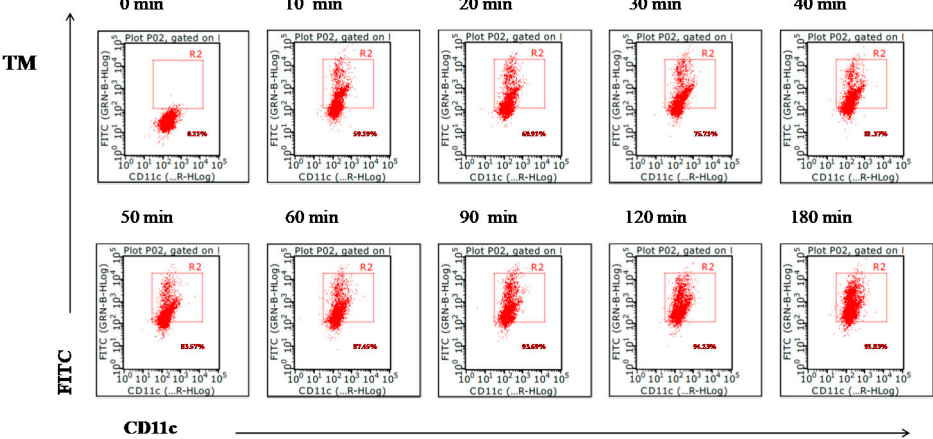

B

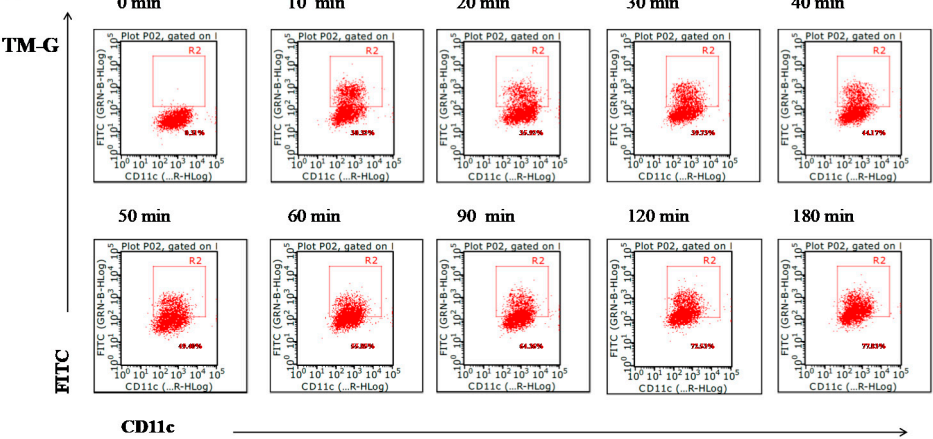

Figuer S2

A

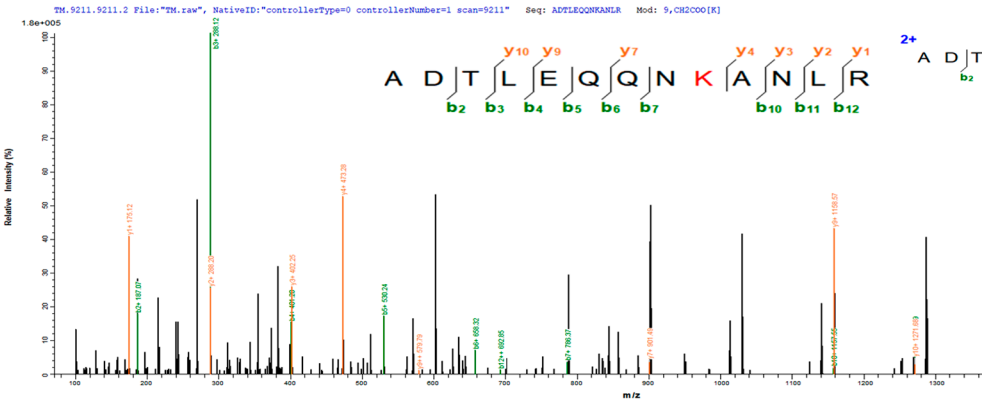

B

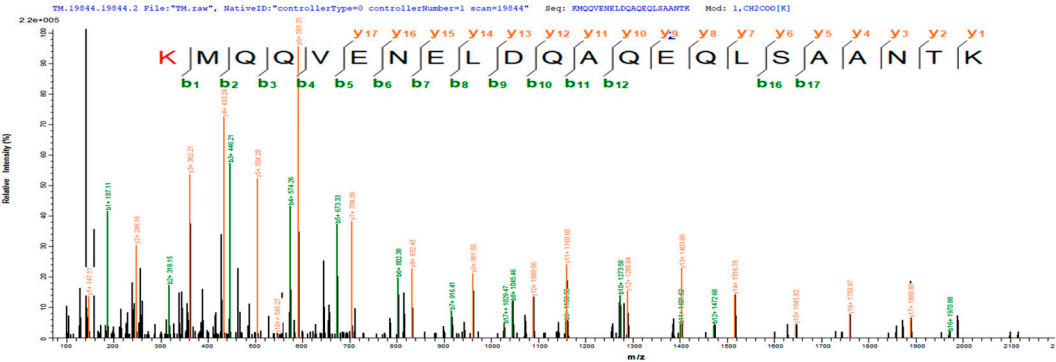

C

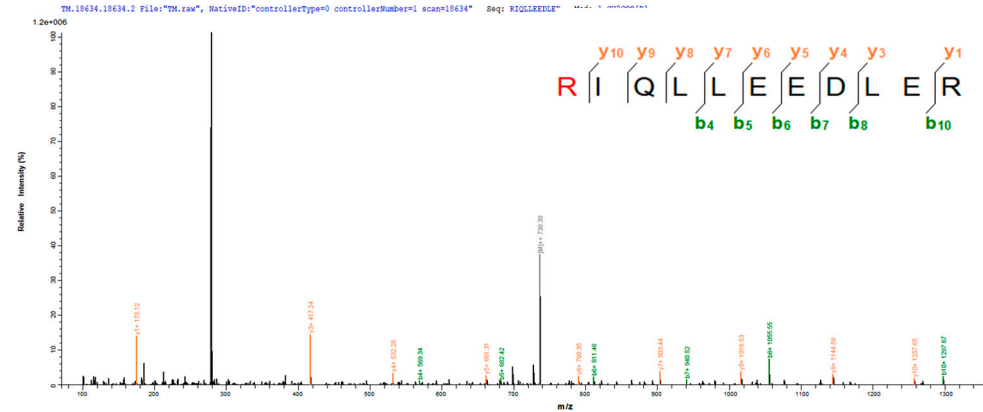

D

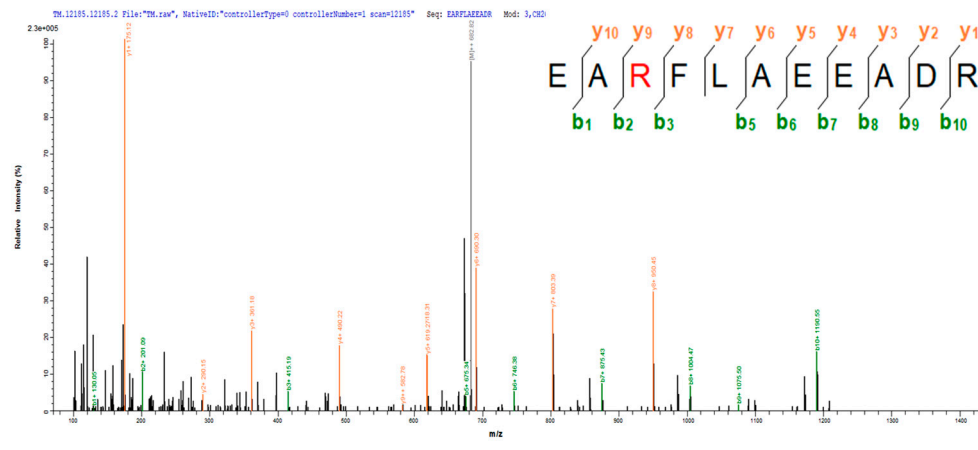

Supplement: s1 [file s1]
